# Supplementary material for: Fungal Interactions Matter: Tricholoma matsutake Domination Affect Fungal Diversity and Function in Mountain Forest Soils
Source: MDPI journal article supplement (doi:10.3390/biology10101051), 2021-10-15
Supplement: s1 [file s1]

## Supplementary

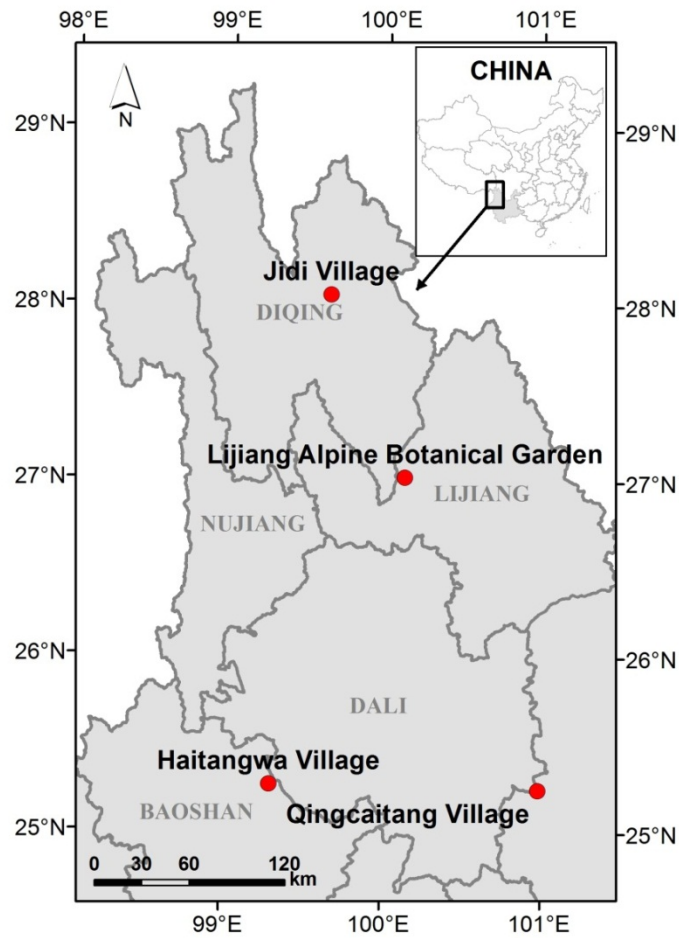

**Figure S1** Location of the study site. The circles indicate the position of Deqing (DQ1, DQ2), Lijing (LJ), Baoshan (BS) and Chuxiong (CX) in Yunnan, South-western China.

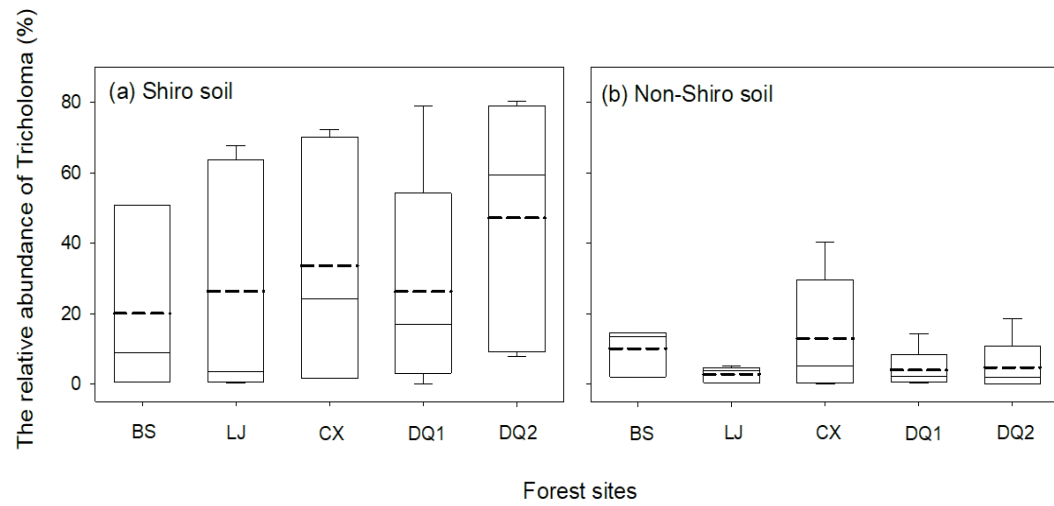

**Figure S2** The relative abundance of *Tricholoma* in Deqing (DQ1, DQ2), Lijing (LJ), Baoshan (BS) and Chuxiong (CX) in Yunnan, South-western China.

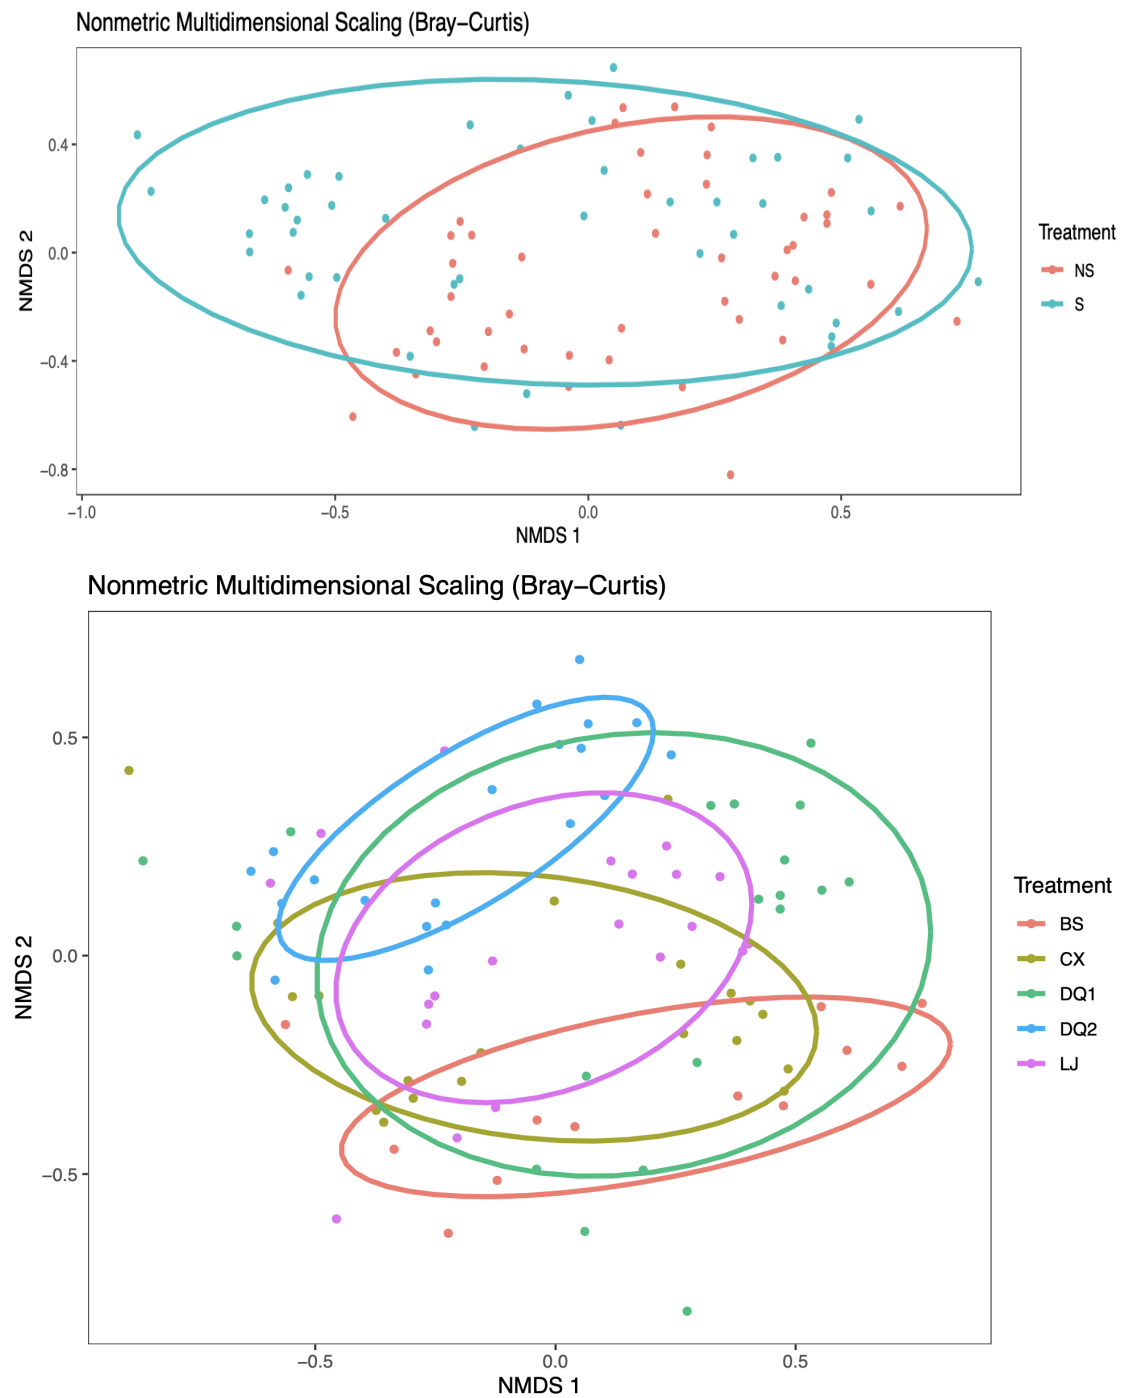

**Figure S3** . Two-dimensional nonmetric multidimensional scaling (NMDS) ordination of fungal communities in shiro (S) and non-shiro (ns) soil in Deqing (DQ1, DQ2), Lijing (LJ), Baoshan (BS) and Chuxiong (CX) in Yunnan, South-western China.

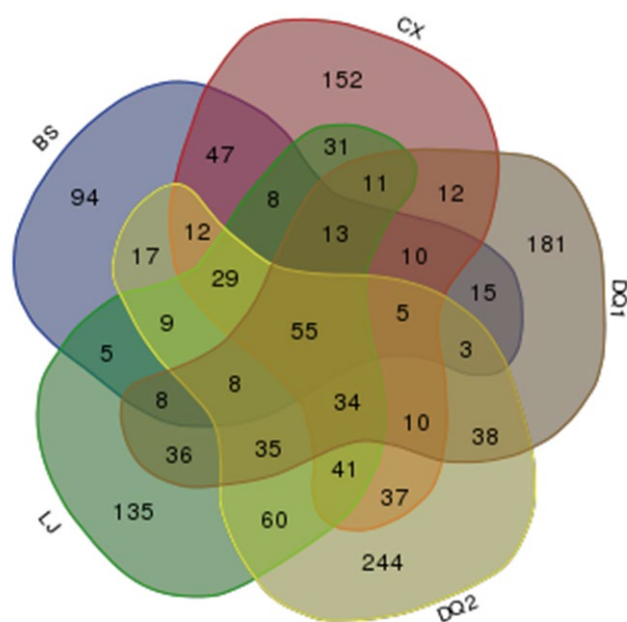

**Figure S4** Venn diagram showing the specific and shared OTUs of shiro soil from Deqing (DQ1, DQ2), Lijing (LJ), Baoshan (BS) and Chuxiong (CX).

**Table. S1** The tree diversity (Tree\_H), richness (Tree-S), DBH (unit: m) and height (High, unit: m), and the diversity and richness of tree colonized by ectomycorrhizal fungi (ECMtree\_H, ECMtree\_S), as well as the diversity and richness of shrub and grass (Shrub\_H, Shrub\_S, Grass\_H, Grass\_S) in the Deqing (DQ1, DQ2), Lijing (LJ), Baoshan (BS) and Chuxiong (CX). One-way ANOVA was used to evaluate the effect of forest types on plant diversity and richness.

| Variables | Forest type |       |       |       |       |       |
|-----------|-------------|-------|-------|-------|-------|-------|
|           | BS          | LJ    | CX    | DQ1   | DQ2   | P     |
| Tree_H    | 1.291       | 1.115 | 1.549 | 1.290 | 0.603 | 0.001 |
| Tree_S    | 2.158       | 1.838 | 2.309 | 2.022 | 0.957 | 0.001 |
| DBH       | 4.444       | 4.234 | 6.354 | 6.562 | 5.476 | 0.031 |
| High      | 4.223       | 3.308 | 3.640 | 4.657 | 4.787 | 0.001 |
| ECMtree_H | 1.253       | 1.046 | 1.471 | 1.074 | 0.571 | 0.001 |
| ECMtree_S | 1.990       | 1.601 | 2.073 | 1.593 | 0.913 | 0.001 |
| Shrub_H   | 1.072       | 1.425 | 1.918 | 1.450 | 1.311 | 0.001 |
| Shrub_S   | 1.365       | 1.973 | 2.295 | 1.894 | 1.545 | 0.001 |
| Grass_H   | 0.449       | 1.536 | 2.024 | 0.938 | 1.790 | 0.001 |
| Grass_S   | 0.536       | 2.296 | 2.516 | 1.982 | 2.496 | 0.001 |

**Table. S2** The effects of Shiro, forest type and their interactions on soil fungal richness, Fisher- $\alpha$  diversity and Pielou evenness.

| Variables                  | Shiro  |                        | Forest type |          | Shiro $\times$ Forest type |          |
|----------------------------|--------|------------------------|-------------|----------|----------------------------|----------|
|                            | F      | <i>p</i>               | F           | <i>p</i> | F                          | <i>p</i> |
| Richness                   | 26.388 | 1.91e <sup>-5***</sup> | 1.646       | 0.191    | 1.305                      | 0.292    |
| Fisher- $\alpha$ diversity | 25.048 | 2.74e <sup>-5***</sup> | 1.648       | 0.190    | 1.176                      | 0.343    |
| Pielou evenness            | 25.743 | 2.27e <sup>-5***</sup> | 0.459       | 0.765    | 0.780                      | 0.548    |

**Table. S3** Permutational analysis of variance (PERMANOVA) of total fungi and fungal trophic groups in all forest types.

|                        | Shiro          |          | Forest type    |          | Shiro $\times$ Forest |          |
|------------------------|----------------|----------|----------------|----------|-----------------------|----------|
|                        | R <sup>2</sup> | P        | R <sup>2</sup> | P        | R <sup>2</sup>        | P        |
| Total fungi            | 0.086          | 0.001*** | 0.231          | 0.001*** | 0.081                 | 0.135    |
| Saprotrophic fungi     | 0.051          | 0.001*** | 0.275          | 0.001*** | 0.083                 | 0.085    |
| Ectomycorrhizal fungi  | 0.084          | 0.001*** | 0.184          | 0.001*** | 0.084                 | 0.162    |
| Plant pathogenic fungi | 0.034          | 0.013*   | 0.236          | 0.001*** | 0.111                 | 0.001*** |
| Animal parasitic fungi | 0.017          | 0.956    | 0.227          | 0.001*** | 0.110                 | 0.757    |
| Mycoparasitic fungi    | 0.061          | 0.051    | 0.373          | 0.001*** | 0.203                 | 0.029*   |

\*  $p < 0.05$ , \*\*  $p < 0.01$ , \*\*\*  $p < 0.001$ .
